# Supplementary material for: Temozolomide and Lomustine Induce Tissue Factor Expression and Procoagulant Activity in Glioblastoma Cells In Vitro
Source: MDPI journal article supplement (doi:10.3390/cancers15082347), 2023-04-18
Supplement: s1 [file s1]

**Table S1.** Primer sequences used for qPCR.

| Gene         | Species | Forward primer          | Reverse primer        |
|--------------|---------|-------------------------|-----------------------|
| <i>F3</i>    | human   | TACAGACAGCCCGGTAGAGT    | AGCTCCAACAGTGCTTCCTT  |
| <i>IL1B</i>  | human   | ATGATGGCTTATTACAGTGGCAA | GTCGGAGATTCGTAGCTGGA  |
| <i>IL6</i>   | human   | GCAGAAAAAGGCAAAGAATC    | CTACATTTGCCGAAGAGC    |
| <i>CXCL8</i> | human   | AGGTGCAGTTTGGCCAAGGA    | TTTCTGTGTTGGCGCAGTGT  |
| <i>TNFA</i>  | human   | CCTCTCTAATCAGCCCTCTG    | GAGGACCTGGGAGTAGATGAG |
| <i>GAPDH</i> | human   | TTCCAGGAGCGAGATCCCT     | CACCCATGACGAACATGGG   |
| <i>ACTB</i>  | human   | GATCAAGATCATTGCTCCTC    | TTGTCAAGAAAGGGTGTAAC  |
